# Supplementary material
Source: publisher site journal article supplement (https://www.dovepress.com/article/407908)
Supplement: Supplementary file 1 [file get_supplementary_file.php]

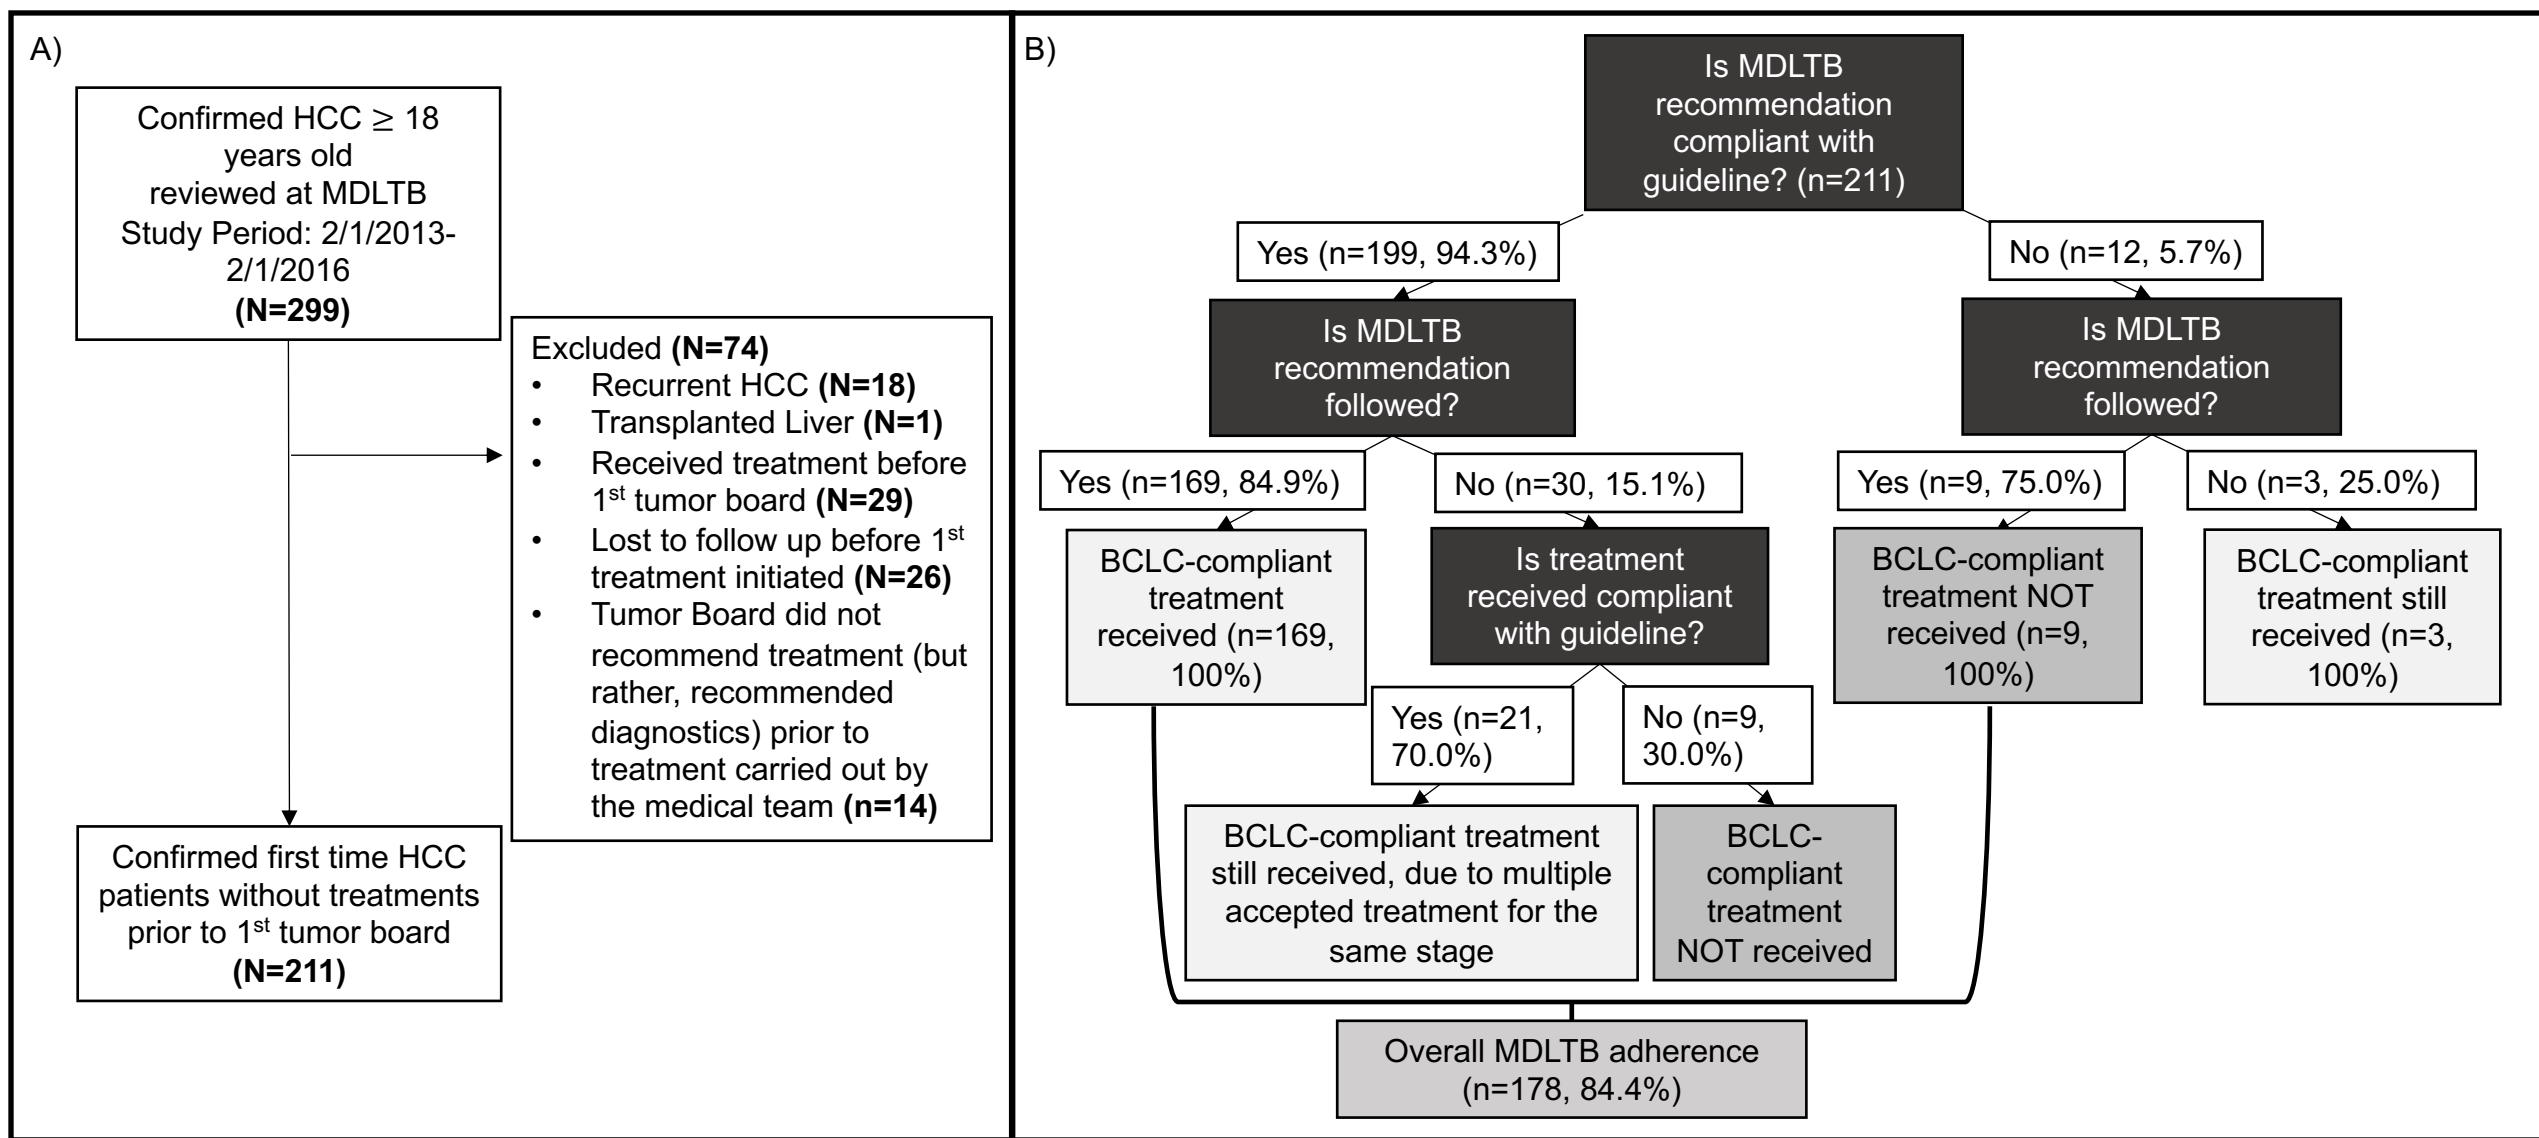

**Supplemental Figure 1 Sensitivity analysis of MDLTB adherence and BCLC compliance excluding cases where the MDLTB recommended further staging and did not later issue a specific treatment recommendation.** Panel A shows the same flowchart in Figure 1, but with an additional exclusion criteria; patients who were evaluated by an MDLTB, and received a recommendation of staging prior to treatment, and were subsequently treated prior a second MDLTB evaluation, are excluded. Panel B shows that this alternative exclusion criteria lowered the adherence rate from 85.3% to 84.4%.
